# Supplementary material for: Physical Activity, Psychological and Functional Outcomes in Non-Ambulatory Stroke Patients during Rehabilitation—A Pilot Study
Source: MDPI journal article supplement (doi:10.3390/jcm11247260), 2022-12-07
Supplement: s1 [file s1]

# Document S1

## Belief in Own Impact on Recovery Scale

MEASUREMENT ..... (baseline/ post-treatment)

Patient's first and last name: ..... Test date: .....

Name and surname of the therapist conducting the test: .....

Comments: .....

Rate **what your recovery depends on**, on a scale of 1 to 5. Where **1** is **the least important** factor and **5** is **the most important** factor. You can only assign each grade once. You assign only one factor 5, only one factor 4, only one factor 3, etc.

- ☐ **from me** (my commitment, my motivation, my strategies for coping with the effects of a stroke)
- ☐ **from a doctor, physical therapist, psychologist and other form of therapy**
- ☐ **from a family, relatives, my surroundings**
- ☐ **from a disease progression**
- ☐ **other** (please specify if there are any other factors not listed on the scale)  
.....
